# Supplementary material for: Effects of the Phosphodiesterase 10A Inhibitor MR1916 on Alcohol Self-Administration and Striatal Gene Expression in Post-Chronic Intermittent Ethanol-Exposed Rats
Source: MDPI journal article supplement (doi:10.3390/cells13040321), 2024-02-09
Supplement: s1 [file s1]

# Supplementary Material

## 1 Supplementary Figures

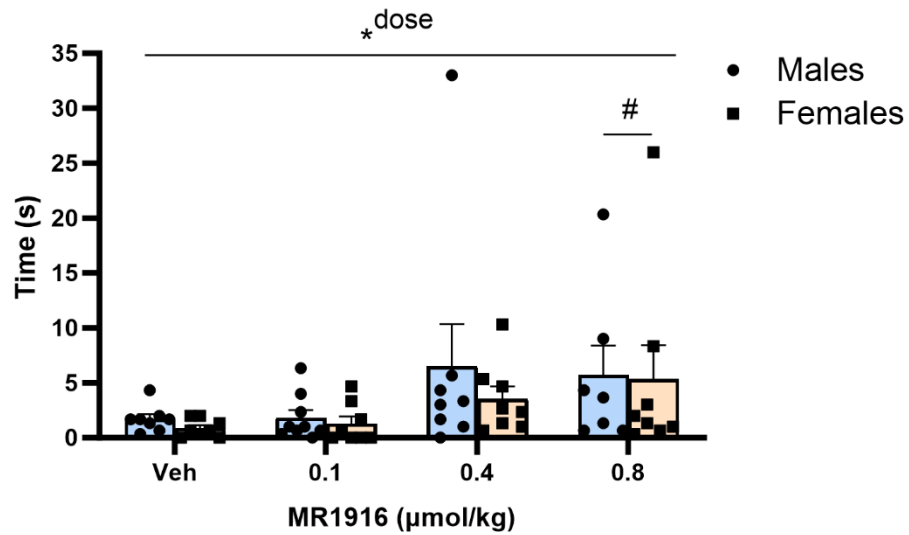

**Figure S1.** Effects of MR1916 pretreatment (-60 min) on the duration of cataleptic responses in male and female rats (n = 7-9/sex/dose) in the bar test. Histograms show group M+SEM, and scatter shows the scores of individual subjects averaged across 3 trials. \*ANOVA Dose main effect. # and line differs significantly from vehicle (LSD test) (all p < 0.05).

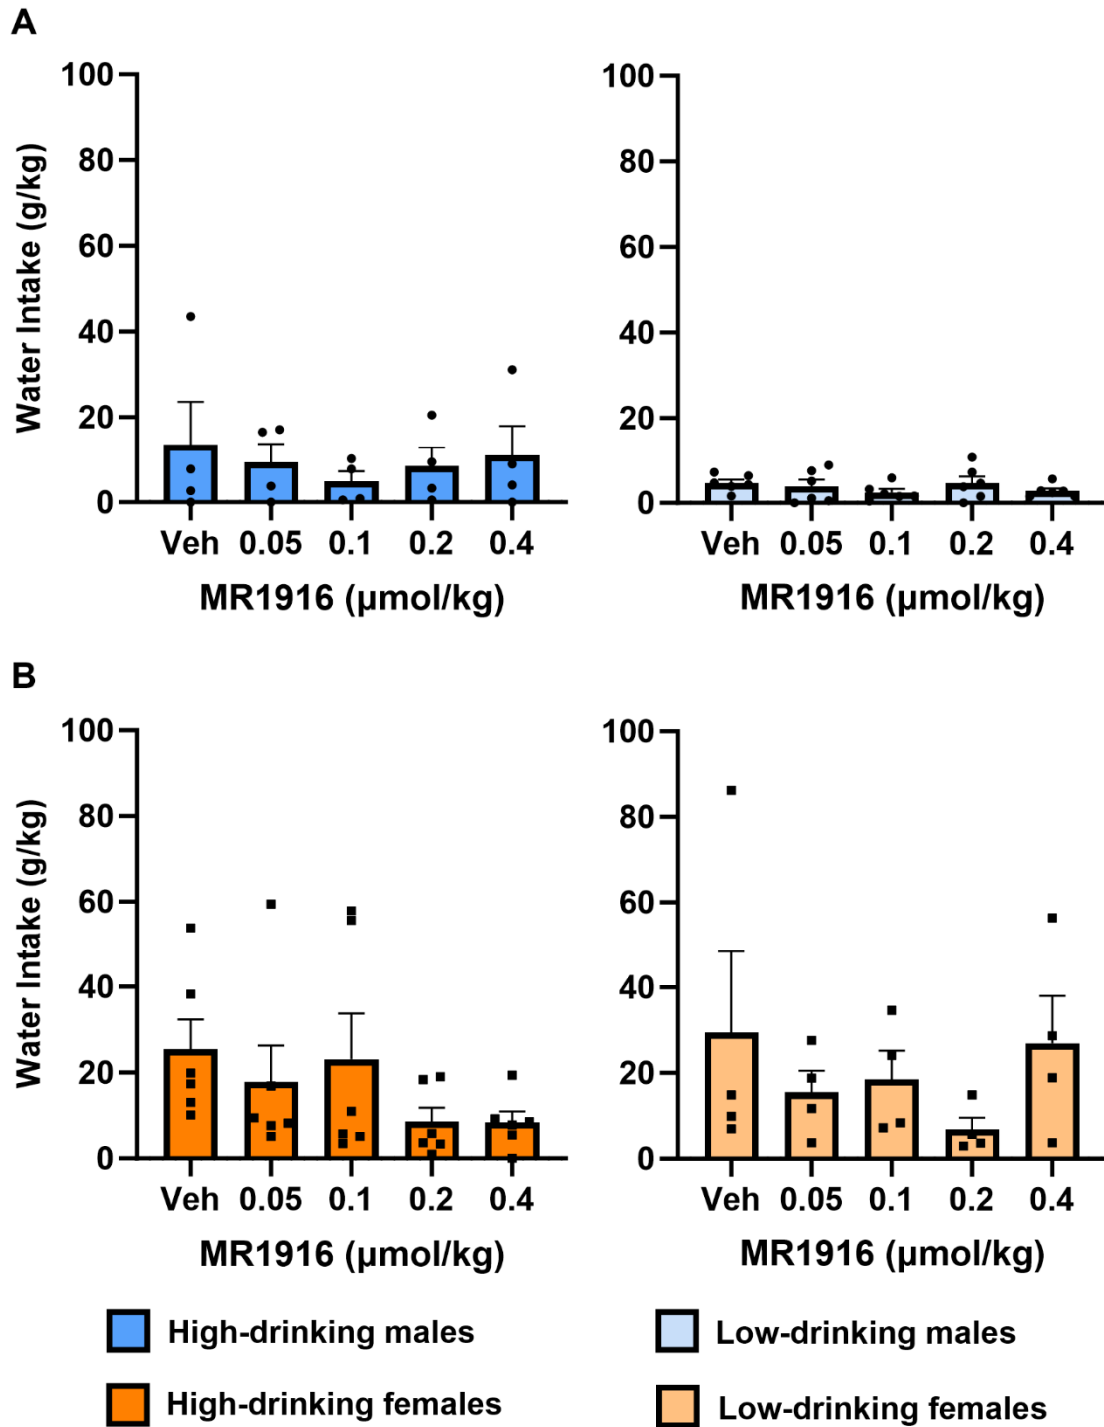

**Figure S2.** Effects of MR1916 pretreatment (-60 min) on water intake in post-CIE (A) male and (B) female rats on ethanol vs. water self-administration. Left panels show high-drinking rats, right panels show low-drinking rats. Histograms show group  $M \pm \text{SEM}$ , and scatter shows the scores of individual subjects.  $N = 10/\text{sex}$ .

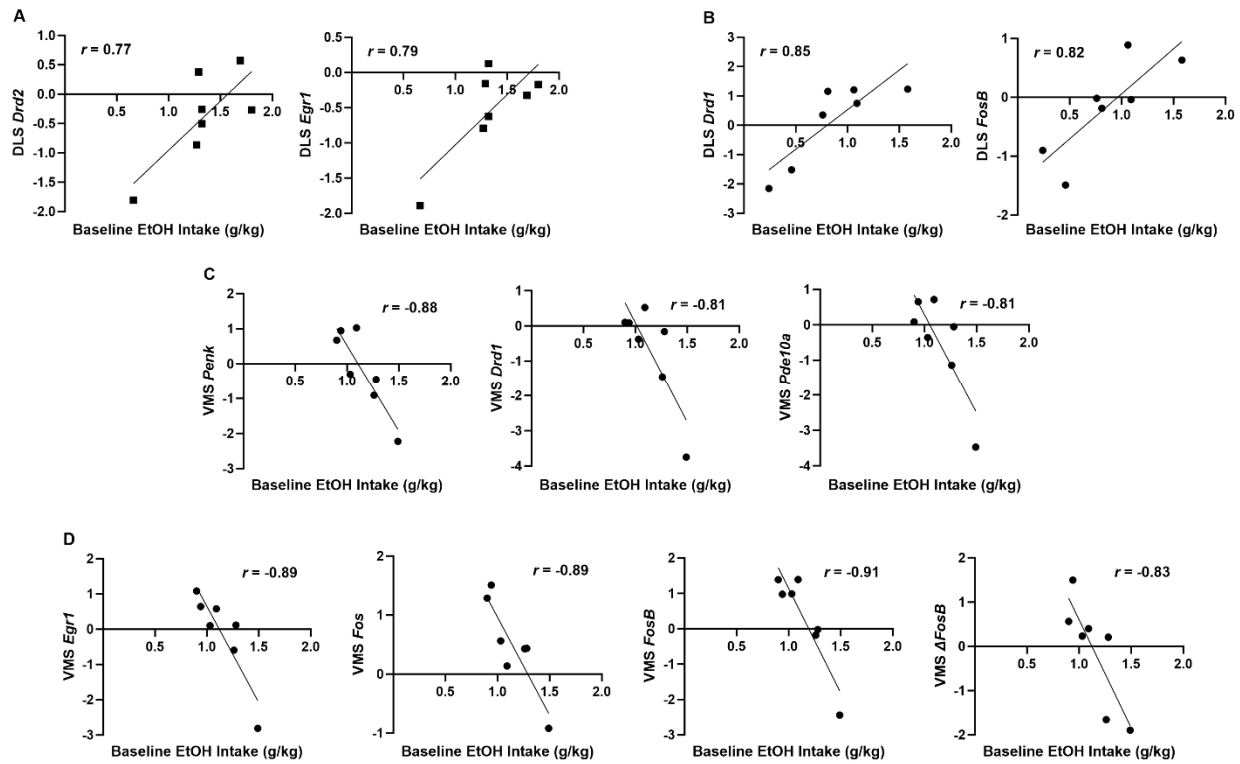

**Figure S3.** Pearson correlations between average baseline drinking and (A) dopamine receptor 2 (*Drd2* - left panel), and early growth response protein 1 (*Egr1* - right panel) expression in the DLS of post-CIE female rats pretreated with the vehicle control; (B) dopamine receptor 1 (*Drd1* - left panel), and FBJ murine osteosarcoma viral oncogene homolog B (*FosB* - right panel) expression in the DLS of male rats pretreated with 0.4  $\mu$ mol/kg MR1916; (C) enkephalin (*Penk* - left panel), dopamine receptor 1 (*Drd1* - middle panel), and phosphodiesterase 10a (*Pde10a* - right panel) expression in the VMS of female rats pretreated with 0.4  $\mu$ mol/kg MR1916; (D) early growth response protein 1 (*Egr1* - far left panel), FBJ murine osteosarcoma viral oncogene homolog (*Fos* - middle-left panel), FBJ murine osteosarcoma viral oncogene homolog B (*FosB* - middle-right panel), delta FBJ murine osteosarcoma viral oncogene homolog B ( $\Delta$ *FosB* - far right panel) expression in the VMS of female rats pretreated with 0.4  $\mu$ mol/kg MR1916.  $N = 7$ .

## 2 Supplementary Tables

**Table S1.** Forward and reverse primer sequences used for qPCR.

| Primer                    | Primer Sequence                                                                                 | Accession number |
|---------------------------|-------------------------------------------------------------------------------------------------|------------------|
| <i>Ywhaz</i> [74]         | FP – 5' – GAA AAT GAA GGG TGA CTA CTA C – 3'<br>RP – 5' – CTG ATT TCA AAT GCT TCT TGG – 3'      | NM_013011.4      |
| <i>Ppia</i> [75]          | FP – 5' – TTT GGG AAG GTG AAA GAA GGC – 3'<br>RP – 5' – ACA GAA GGA ATG GTT TGA TGG G – 3'      | NM_017101.1      |
| <i>Tac1</i> [76]          | FP - 5' – ACG CAC TAT CTA TTC ATC TTC ATC - 3'<br>RP - 5' – AGA ATT ACA AGG CTT ATT GGC A – 3'  | NM_012666.2      |
| <i>Drd1</i> [77]          | FP - 5' - GAA GCA AAT CCG GCG CAT CTC - 3'<br>RP - 5' - TTC AGA CTG GGC GCA TTC GAC - 3'        | NM_012546.3      |
| <i>Drd2</i> [77]          | FP - 5' - CCT TAA GAC GAT GAG CCG CAG AA - 3'<br>RP - 5' - GGT TGA CGG CAC TGT TGA CAT AGC - 3' | NM_012547.3      |
| <i>Penk</i> *             | FP – 5' – ACT TCC TGG CAT GCA CAC TCG AA– 3'<br>RP - 5' – CGA TGT TAT CCC AAG GGA ACT CGG– 3'   | NM_017139.2      |
| <i>Pde10a</i> *           | FP – 5' – CGC CAC TGA CCT CGC ACT GT – 3'<br>RP – 5' – CGC AGG CAG TCA TCA TCA AGC – 3'         | NM_022236.2      |
| <i>Egr1</i> [78]          | FP - 5' - TGC ACC CAC CTT TCC TAC TC - 3'<br>RP - 5' - AGG TCT CCC TGT TGT TGT GG - 3'          | NM_012551.3      |
| <i>Fos</i> [79]           | FP - 5' - CAG CCT TTC CTA CTA CCA TTC C - 3'<br>RP - 5' - ACA GAT CTG CGC AAA AGT CC - 3'       | NM_022197.2      |
| <i>FosB</i> [47]          | FP - 5' - GTG AGA GAT TTG CCA GGG TC - 3'<br>RP - 5' - AGA GAG AAG CCG TCA GGT TG - 3'          | NM_001256509.1   |
| $\Delta$ <i>FosB</i> [47] | FP - 5' - AGG CAG AGC TGG AGT CGG AGA T - 3'<br>RP - 5' - GCC GAG GAC TTG AAC TTC ACT CG - 3'   | XM_039101873.1   |

\* Primers designed *in house*.

**Table S2.** *F*-statistic and *Dfs* for Anova analysis

| Variable             | Grouping              | Type of effect                  | Effect              | df1     | df2 | F-ratio | p-value |
|----------------------|-----------------------|---------------------------------|---------------------|---------|-----|---------|---------|
| Ethanol intake       | Overall               | Between                         | drinking level      | 1       | 16  | 6.655   | 0.02    |
|                      |                       | Within                          | dose*drinking level | 4       | 64  | 2.746   | 0.036   |
|                      |                       | Quadratic contrast <sup>1</sup> | dose                | 1       | 16  | 10.96   | 0.004   |
|                      | Males                 | Linear contrast <sup>1</sup>    | dose                | 1       | 8   | 6.93    | 0.03    |
|                      |                       | Linear contrast <sup>1</sup>    | dose*drinking level | 1       | 8   | 10.367  | 0.012   |
|                      | Females               | Quadratic contrast <sup>1</sup> | dose                | 1       | 8   | 7.873   | 0.023   |
|                      |                       | Between                         | drinking level      | 1       | 16  | 6.655   | 0.02    |
|                      | High drinking females | Quadratic contrast <sup>1</sup> | dose                | 1       | 5   | 21.139  | 0.006   |
|                      | Low drinking males    | Linear contrast <sup>1</sup>    | dose                | 1       | 5   | 9.599   | 0.027   |
| Ethanol preference   | Overall               | Between                         | sex                 | 1       | 16  | 5.073   | 0.039   |
|                      |                       | Quadratic contrast <sup>1</sup> | dose                | 1       | 16  | 19.695  | <0.001  |
|                      | Females               | Linear contrast <sup>1</sup>    | dose*drinking level | 1       | 8   | 10.367  | 0.012   |
|                      | High drinking females | Quadratic contrast <sup>1</sup> | dose                | 1       | 5   | 8.402   | 0.034   |
|                      | Low drinking females  | Within                          | dose                | 4       | 12  | 3.343   | 0.047   |
|                      |                       | Quadratic contrast <sup>1</sup> | dose                | 1       | 3   | 14.342  | 0.031   |
|                      | Water intake          | Overall                         | Between             | sex     | 1   | 16      | 7.552   |
| <i>Drd1</i>          | Naïve – DLS           | Between                         | treatment           | 1       | 19  | 4.955   | 0.038   |
| <i>Drd2</i>          |                       |                                 | treatment           | 1       | 19  | 5.467   | 0.03    |
| <i>Pde10a</i>        |                       |                                 | treatment           | 1       | 19  | 5.477   | 0.03    |
|                      |                       |                                 | sex                 | 1       | 19  | 10.245  | 0.005   |
| <i>Egr1</i>          |                       |                                 | treatment           | 1       | 19  | 27.001  | <0.001  |
| <i>Fos (ln)</i>      |                       |                                 | sex                 | 1       | 19  | 13.984  | 0.001   |
|                      |                       |                                 | sex                 | 1       | 19  | 5.351   | 0.032   |
| <i>FosB</i>          |                       |                                 | treatment           | 1       | 19  | 13.425  | 0.002   |
|                      |                       |                                 | sex                 | 1       | 19  | 51.639  | <0.001  |
| $\Delta$ <i>FosB</i> |                       |                                 | treatment           | 1       | 19  | 7.587   | 0.013   |
|                      |                       |                                 | sex                 | 1       | 19  | 25.007  | <0.001  |
| <i>Tac1</i>          |                       |                                 | Naïve - VMS         | Between | sex | 1       | 19      |
| <i>Drd1</i>          | sex                   | 1                               |                     |         | 19  | 4.895   | 0.039   |
| <i>Drd2</i>          | sex                   | 1                               |                     |         | 19  | 35.054  | <0.001  |
| <i>Pde10a</i>        | sex                   | 1                               |                     |         | 19  | 19.508  | <0.001  |
| <i>Egr1</i>          | sex                   | 1                               |                     |         | 19  | 15.588  | 0.001   |
| <i>FosB</i>          | treatment*sex         | 1                               |                     |         | 19  | 5.838   | 0.026   |
|                      | treatment             | 1                               |                     |         | 19  | 4.736   | 0.042   |

|               |                                       |         |                          |   |    |        |        |
|---------------|---------------------------------------|---------|--------------------------|---|----|--------|--------|
|               |                                       |         | sex                      | 1 | 19 | 16.205 | 0.001  |
| $\Delta FosB$ |                                       |         | sex                      | 1 | 19 | 8.505  | 0.009  |
| <i>Penk</i>   |                                       |         | treatment                | 2 | 35 | 3.477  | 0.042  |
| <i>Egr1</i>   |                                       |         | sex                      | 1 | 35 | 5.702  | 0.008  |
|               |                                       |         | treatment                | 2 | 35 | 8.725  | 0.001  |
| <i>Fos</i>    | Post-dependent - DLS                  | Between | treatment*sex            | 2 | 35 | 7.817  | 0.002  |
|               |                                       |         | treatment                | 2 | 35 | 16.941 | <0.001 |
|               |                                       |         | sex                      | 1 | 35 | 5.186  | 0.029  |
| <i>FosB</i>   |                                       |         | treatment*sex            | 2 | 35 | 4.263  | 0.022  |
|               |                                       |         | treatment                | 2 | 35 | 8.625  | 0.001  |
|               |                                       |         | sex                      | 1 | 35 | 11.82  | 0.002  |
| $\Delta FosB$ |                                       |         | treatment                | 2 | 35 | 4.274  | 0.022  |
| <i>Fos</i>    | Post-CIE - VMS                        | Between | treatment                | 1 | 35 | 7.239  | 0.002  |
| <i>Tac1</i>   |                                       |         | treatment*drinking level | 2 | 16 | 10.365 | 0.001  |
| <i>Drd1</i>   | High vs. Low drinking male rats - DLS | Between | treatment*drinking level | 2 | 16 | 6.629  | 0.008  |
|               |                                       |         | drinking level           | 1 | 16 | 6.045  | 0.026  |
| <i>Pde10a</i> |                                       |         | treatment*drinking level | 2 | 16 | 3.914  | 0.041  |
| <i>FosB</i>   |                                       |         | drinking level           | 1 | 16 | 6.571  | 0.021  |
| <i>Egr1</i>   | High vs. Low drinking male rats - VMS | Between | treatment*drinking level | 2 | 15 | 9.156  | 0.003  |
|               |                                       |         | treatment                | 2 | 15 | 14.8   | <0.001 |
|               |                                       |         | drinking level           | 1 | 15 | 5.669  | 0.031  |
| <i>Fos</i>    |                                       |         | treatment*drinking level | 2 | 15 | 5.552  | 0.016  |
|               |                                       |         | treatment                | 2 | 15 | 4.601  | 0.028  |
| $\Delta FosB$ |                                       |         | drinking level           | 1 | 15 | 6.369  | 0.023  |

| Variable      | Grouping             | Type of effect               | Effect    | Contrast Estimate | SE    | 95% CI (Lower-Upper) | p-value |
|---------------|----------------------|------------------------------|-----------|-------------------|-------|----------------------|---------|
| <i>Penk</i>   |                      |                              |           | 0.588             | 0.224 | 0.133 - 1.043        | 0.013   |
| <i>Egr1</i>   |                      |                              |           | 0.808             | 0.209 | 0.838 - 1.233        | <0.001  |
| <i>Fos</i>    | Post-dependent - DLS | Linear contrast <sup>2</sup> | treatment | 0.942             | 0.175 | 0.587 - 1.298        | <0.001  |
| <i>FosB</i>   |                      |                              |           | 0.755             | 0.198 | 0.352 - 1.157        | 0.001   |
| $\Delta FosB$ |                      |                              |           | 0.429             | 0.182 | 0.058 - 0.799        | 0.024   |

|             |                                                   |                                 |           |       |       |                  |       |
|-------------|---------------------------------------------------|---------------------------------|-----------|-------|-------|------------------|-------|
| <i>Fos</i>  | Post-dependent<br>- VMS                           | Linear contrast <sup>2</sup>    | treatment | 0.792 | 0.221 | 0.343 -<br>1.240 | 0.001 |
| <i>Egr1</i> | High vs.<br>Low<br>drinking<br>male rats -<br>VMS | Quadratic contrast <sup>2</sup> | treatment | 0.684 | 0.167 | 0.328 -<br>1.039 | 0.001 |
| <i>Fos</i>  |                                                   | Linear contrast <sup>2</sup>    |           | 0.773 | 0.3   | 0.133 -<br>1.414 | 0.021 |

<sup>1</sup>Within-subject contrast analysis. <sup>2</sup>Between-subject (K-matrix) contrast analysis.

### 3 References

47. Weiss, F., Lorang, M. T., Bloom, F. E., & Koob, G. F. (1993). Oral alcohol self-administration stimulates dopamine release in the rat nucleus accumbens: genetic and motivational determinants. *Journal of Pharmacology and Experimental Therapeutics*, 267(1), 250-258.
74. Oliveira, S. R., Vieira, H. L., & Duarte, C. B. (2015). Effect of carbon monoxide on gene expression in cerebrocortical astrocytes: Validation of reference genes for quantitative real-time PCR. *Nitric Oxide*, 49, 80-89.
75. Boué, J., Blanpied, C., Brousset, P., Vergnolle, N., & Dietrich, G. (2011). Endogenous opioid-mediated analgesia is dependent on adaptive T cell response in mice. *The Journal of Immunology*, 186(9), 5078-5084.
76. Valenza, M., Steardo, L., Cottone, P., & Sabino, V. (2015). Diet-induced obesity and diet-resistant rats: differences in the rewarding and anorectic effects of D-amphetamine. *Psychopharmacology*, 232(17), 3215-3226.
77. Burnett, L. A., Blais, E. M., Unadkat, J. D., Hille, B., Tilley, S. L., & Babcock, D. F. (2010). Testicular expression of Adora3i2 in Adora3 knockout mice reveals a role of mouse A3Ri2 and human A3Ri3 adenosine receptors in sperm. *Journal of Biological Chemistry*, 285(44), 33662-33670.
78. Kim, H. S., Suh, K. S., Sul, D., Kim, B. J., Lee, S. K., & Jung, W. W. (2012). The inhibitory effect and the molecular mechanism of glabridin on RANKL-induced osteoclastogenesis in RAW264. 7 cells. *International journal of molecular medicine*, 29(2), 169-177.
79. Alibhai, I. N. (2006). Regulation of FOSB mRNA Isoforms by Drugs of Abuse (Doctoral dissertation).
